# Supplementary material for: Simultaneous removal of multiple heavy metals from soil by washing with citric acid and ferric chloride
Source: PubMed Central journal article supplement — RSC Adv. 2020 Feb 19;10(13):7432–42. doi: 10.1039/c9ra09999a (PMC9049904; doi:10.1039/c9ra09999a), 2020-02-19
Supplement: RA-010-C9RA09999A-s001.pdf [file RA-010-C9RA09999A-s001.pdf]

1 **Simultaneously remove multiple heavy metals from soil by washing with citric acid and**  
2 **ferric chloride**

3

4 **Jiyan Shi<sup>a</sup>, Jingli Pang<sup>a</sup>, Qinglin Liu<sup>a</sup>, Yating Luo<sup>a</sup>, Jien Ye<sup>a</sup>, Qiao Xu<sup>a</sup>, Bibo Long<sup>c</sup>,**  
5 **Binhui Ye<sup>d</sup> and Xiaofeng Yuan<sup>\*b</sup>**

6

7 <sup>a</sup>Department of Environmental Engineering, College of Environmental and Resource Sciences,  
8 Zhejiang University, Hangzhou, 310058, China.

9 <sup>b</sup>College of Life Science, Zhejiang Chinese Medical University, Hangzhou, 310053, China.

10 <sup>c</sup>Guangzhou Sugarcane Industry Research Institute, Guangdong Bioengineering Institute,  
11 Guangzhou, 510316, China.

12 <sup>d</sup>Chengbang Eco-Environment Co., Ltd., Hangzhou, 310002, China.

13

14

15

16 **\*Corresponding Author**

17 Xiaofeng Yuan, College of Life Science, Zhejiang Chinese Medical University, 310053  
18 Hangzhou, China.

19 Tel.: +86-0571-88613051;

20 E-mail: [yuanxiaofeng@zcmu.edu.cn](mailto:yuanxiaofeng@zcmu.edu.cn).

21

23 **Electronic Supplementary Information:**

24 Number of pages: 7

25 Number of tables: 1

26 Number of figures: 5

27

28 **Materials and methods**

29 **2.3. Determination of optimal washing conditions**

30 Batch washing experiments were set to explore the optimal washing conditions by CA  
31 and FeCl<sub>3</sub> (v/v, 5:5). Experiments were performed as following parameters:

32 (1) Washing solution concentrations: 0.25, 0.5, 0.75 and 1.00 mol L<sup>-1</sup> (washing time of  
33 10 h, liquid: soil ratio of 10:1). The optimal washing concentrations will be used in the further  
34 experiments.

35 (2) Washing time: 0, 5, 10 and 15 min, 0.5, 1, 1.5, 2, 4, 6, 8, 10, 12, 18 and 24 h (liquid:  
36 soil ratio of 10:1). The optimal washing time will be used for further studies.

37 (3) Liquid: soil ratios: 1: 1, 3: 1, 5: 1, 7: 1, 10: 1, 12: 1, 15: 1, 20: 1 and 30: 1 (washing  
38 time of 10 h).

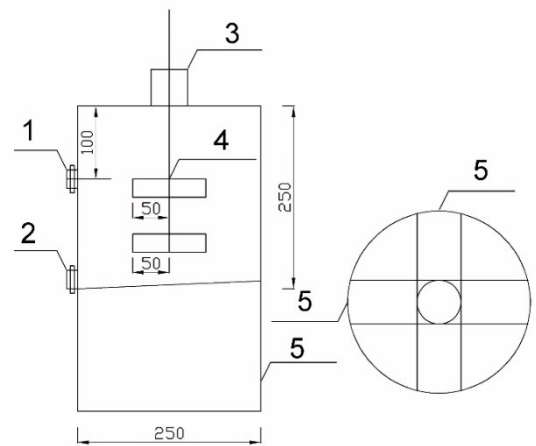

**Fig. S1.** Schematic illustration of experiment apparatus. 1, liquid sampling valve; 2, sludge sampling valve; 3, stirring paddle controller; 4, stirring paddle; 5, retractable frame.

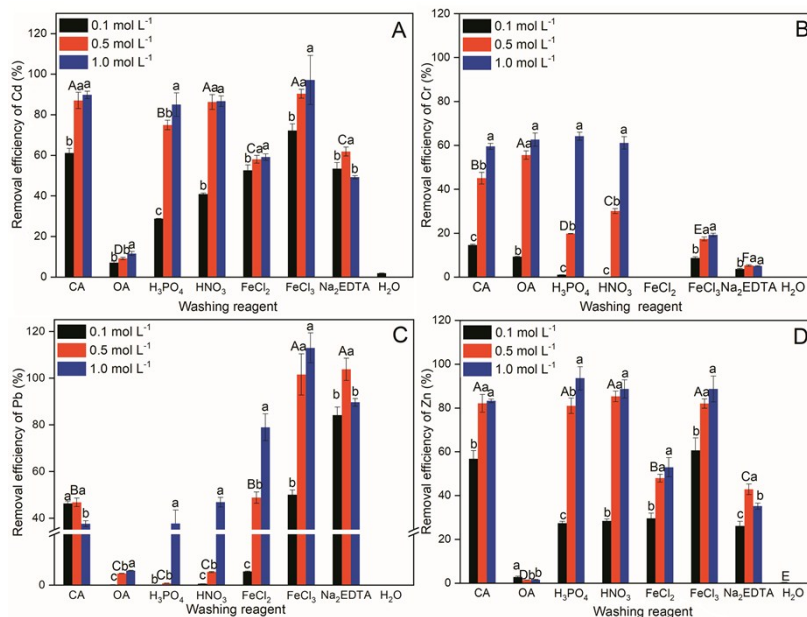

**Fig. S2.** Removal efficiencies of Cd (A), Cr (B), Pb (C) and Zn (D) by washing with different agents. Error bar indicate the standard deviation of the mean (n=3); Different letters (a-c) on the top of the error bars indicate significant difference among different agent concentration groups; Different letters (A-F) on the top of the error bars indicate significant difference among different agents at the concentration of 0.5 mol L<sup>-1</sup> (one-way ANOVA,  $P < 0.05$ ).

44 **Table S1.** Removal efficiencies of heavy metals in different treatments. Different letters  
 45 indicate significant difference among different treatments (one-way ANOVA,  $P < 0.05$ ).

| Composite<br>washing<br>combination  | Ratio<br>(v/v) | Cd (%)              | Cr (%)              | Pb (%)              | Zn (%)              |
|--------------------------------------|----------------|---------------------|---------------------|---------------------|---------------------|
| HNO <sub>3</sub>                     | /              | 93.6±1.6 (a)        | 46.8±1.7(de)        | 10.6±0.8 (g)        | 87.0±1.0 (a)        |
| CA                                   | /              | 78.4±2.0 (ef)       | 44.4±1.4 (ef)       | 51.5±3.5 (d)        | 81.2±0.6 (b)        |
| OA                                   | /              | 10.4±0.6 (m)        | 63.8±0.4 (a)        | 5.4±0.3 (ij)        | 9.0±0.2 (mn)        |
| FeCl <sub>3</sub>                    | /              | 67.7±1.0 (hi)       | 15.6±0.4 (l)        | 98.2±1.3 (c)        | 69.4±0.5 (f)        |
| HNO <sub>3</sub> : CA                | 8:2            | 89.4±2.7 (b)        | 42.0±1.4(fg)        | 8.2±0.4 (ghi)       | 81.0±1.4 (b)        |
| HNO <sub>3</sub> : CA                | 5:5            | 82.0±2.8 (cde)      | 38.8±1.3 (h)        | 9.5±0.6 (gh)        | 77.7±0.9 (c)        |
| HNO <sub>3</sub> : CA                | 2:8            | 79.9±2.3 (def)      | 42.8±0.0(fg)        | 27.5±0.8 (e)        | 80.4±0.8 (b)        |
| HNO <sub>3</sub> : OA                | 8:2            | 83.8±1.6 (c)        | 48.7±3.5 (d)        | 24.8±3.4 (e)        | 80.8±1.3 (b)        |
| HNO <sub>3</sub> : OA                | 5:5            | 29.5±2.3 (l)        | 58.8±3.3 (b)        | 5.6±1.5 (ij)        | 30.3±0.4 (k)        |
| HNO <sub>3</sub> : OA                | 2:8            | 12.2±0.6 (m)        | 59.2±1.2 (b)        | 4.6±0.3 (j)         | 10.2±0.8 (m)        |
| HNO <sub>3</sub> : FeCl <sub>3</sub> | 8:2            | 83.0±1.8 (cd)       | 32.8±1.2 (i)        | 51.3±1.9 (d)        | 79.9±0.6 (b)        |
| HNO <sub>3</sub> : FeCl <sub>3</sub> | 5:5            | 77.7±3.6 (f)        | 18.5±0.2 (k)        | 100.5±3.1(abc)      | 72.9±1.8 (d)        |
| HNO <sub>3</sub> : FeCl <sub>3</sub> | 2:8            | 72.9±1.5 (g)        | 16.1±0.5 (kl)       | 102.9±1.8 (a)       | 70.1±1.4 (ef)       |
| CA: OA                               | 8:2            | 33.4±3.8 (k)        | 46.0±1.1 (e)        | 7.1±2.3 (hij)       | 44.1±1.2 (j)        |
| CA: OA                               | 5:5            | 12.6±1.5 (m)        | 53.6±1.1 (c)        | 6.0±0.6 (ij)        | 12.9±0.2 (l)        |
| CA: OA                               | 2:8            | 7.8±0.4 (n)         | 60.6±1.2 (b)        | 3.9±0.2 (j)         | 8.0±0.2 (n)         |
| CA: FeCl <sub>3</sub>                | 8:2            | 80.4±1.6(cdef)      | 43.2±0.8(fg)        | 19.8±0.4 (f)        | 78.0±1.0 (c)        |
| <b>CA: FeCl<sub>3</sub></b>          | <b>5:5</b>     | <b>73.7±3.0 (g)</b> | <b>41.3±0.8 (g)</b> | <b>98.0±1.3 (c)</b> | <b>71.4±1.3(de)</b> |
| CA: FeCl <sub>3</sub>                | 2:8            | 73.1±1.4 (g)        | 27.2±0.8 (j)        | 99.5±4.1 (bc)       | 70.9±0.6 (ef)       |
| OA: FeCl <sub>3</sub>                | 8:2            | 61.9±3.3 (j)        | 59.5±3.0 (b)        | 24.9±0.6 (e)        | 56.3±1.2 (i)        |
| OA: FeCl <sub>3</sub>                | 5:5            | 70.3±1.8 (gh)       | 38.2±1.5 (h)        | 98.2±1.1 (c)        | 67.5±0.4 (g)        |
| OA: FeCl <sub>3</sub>                | 2:8            | 65.9±0.7 (i)        | 16.7±0.2 (kl)       | 102.0±0.5 (ab)      | 65.5±0.6 (h)        |

47

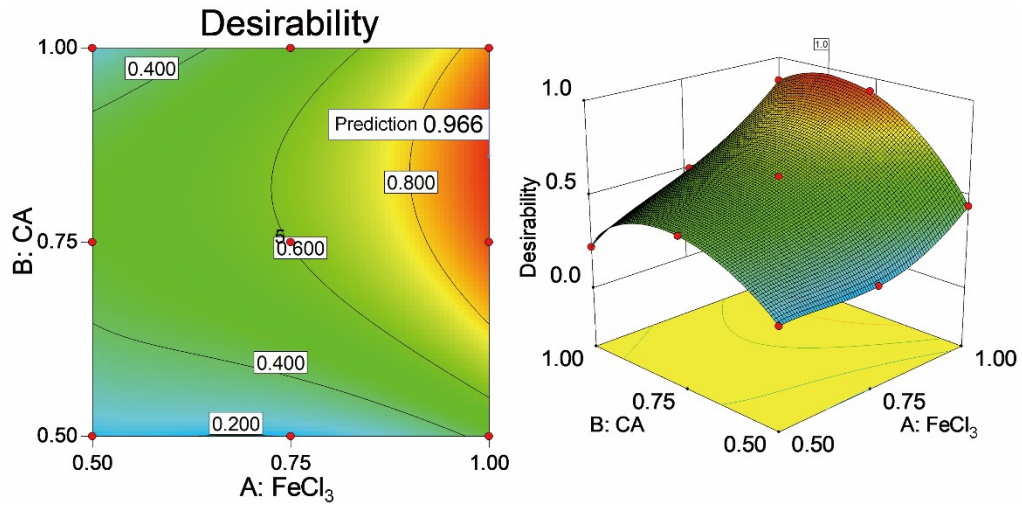

**Fig. S3.** The desirable washing agents concentration maps for the removal of heavy metals from soil obtained by response surface maps of model.

48

49

50

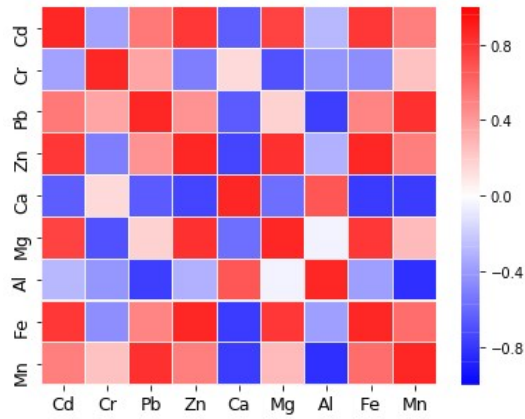

**Fig. S4.** Correlation analysis of the content of heavy metals and soil elements (Ca, Mg, Al, Fe, Mn) in different treatments.

51

53

54

55

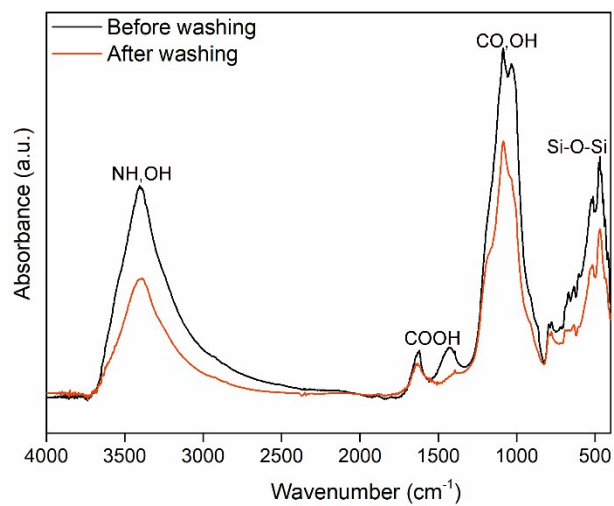

**Fig. S5.** FTIR image of the original soil before and after washing with CA and FeCl<sub>3</sub>.

56
